# Supplementary material for: Controlled evaporation-induced phase separation of droplets containing nanogels and salt molecules
Source: Royal Society of Chemistry journal article supplement (doi:10.1039/d2ra04585k), 2022-01-01
Supplement: d2ra04585k6.pdf [file d2ra04585k6.pdf]

1 **Supporting Information**

2 **Controlled Evaporation-Induced Phase Separation of Droplets Containing Nanogels and**

3 **Salt Molecules**

4 Yuandu Hu\*

5 \*Departments of Materials Science and Engineering, Department of Physics, School of Physical

6 Science and Engineering, Beijing Jiaotong University, Beijing, China

7 Email: [huyd@bjtu.edu.cn](mailto:huyd@bjtu.edu.cn)

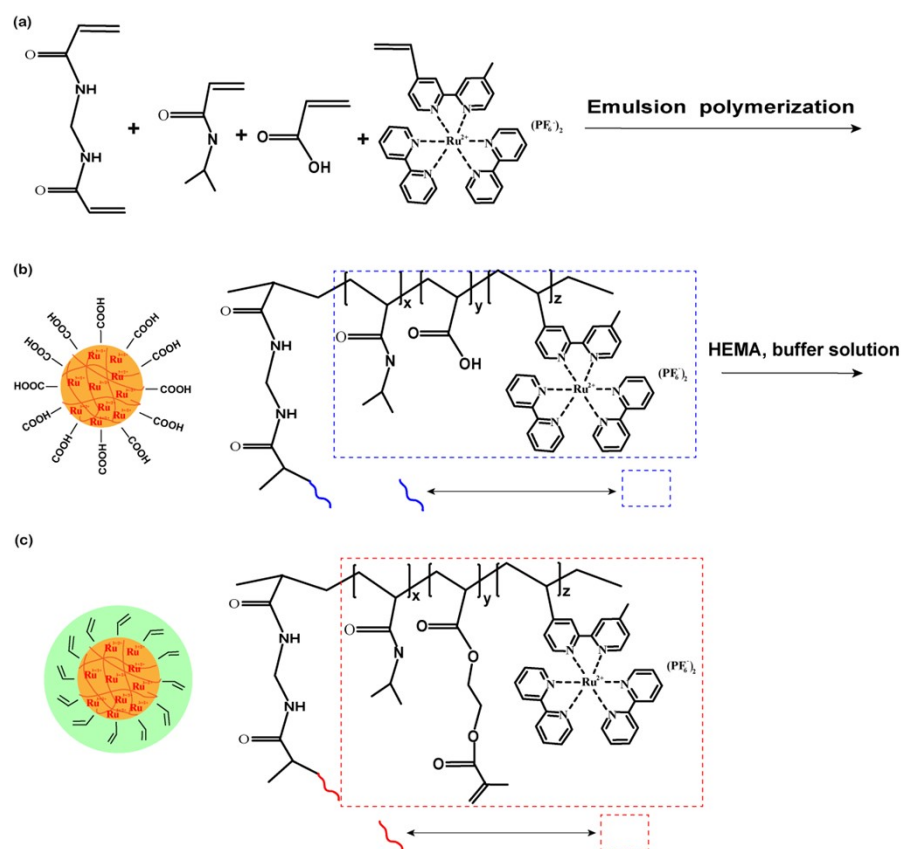

8

9 **Figure S1.** Synthetic routes of pNIPAAm-AAc-Ruthenium gel particles and HEMA modified

10 pNIPAAm-AAc-Ruthenium gel particles.

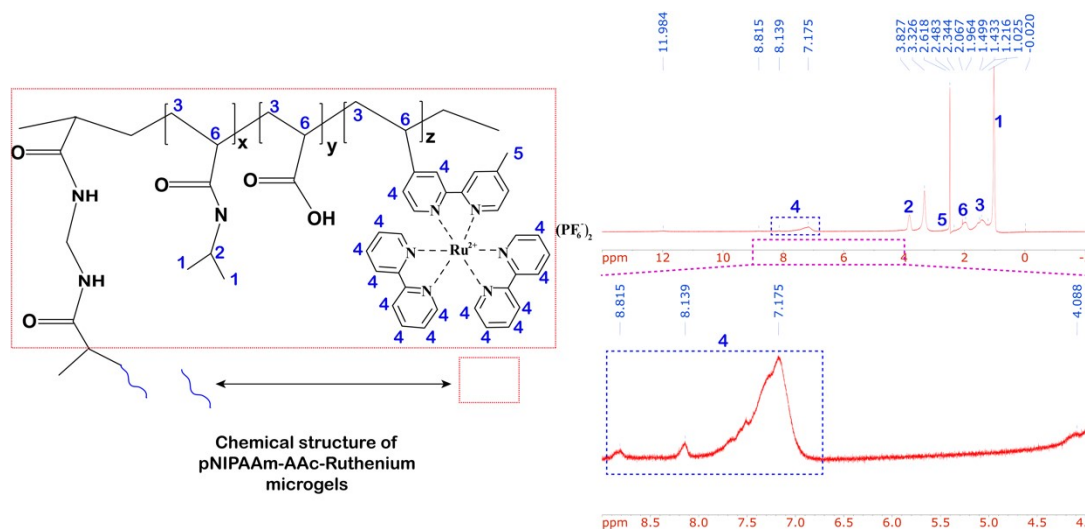

**Figure S2.**  $^1\text{H}$  NMR spectrum of the pNIPAAm-AAc-Ruthenium nanogels.

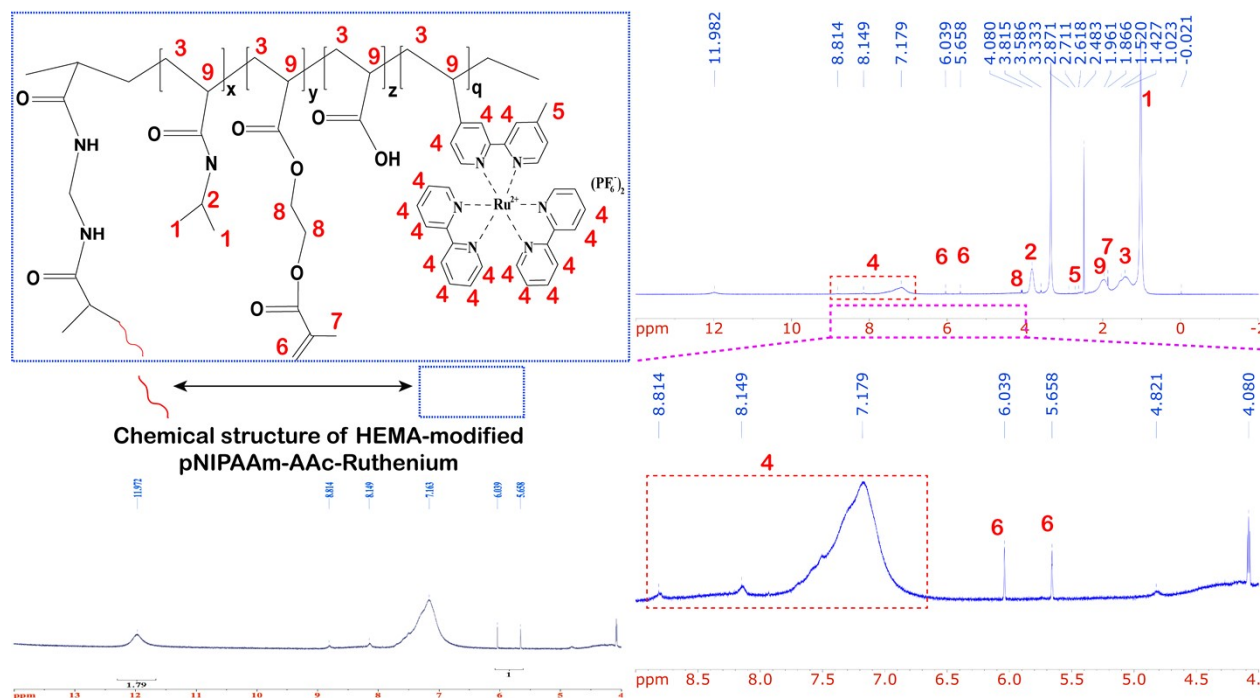

**Figure S3.**  $^1\text{H}$  NMR spectrum of the HEMA-modified pNIPAAm-AAc-Ruthenium nanogels.

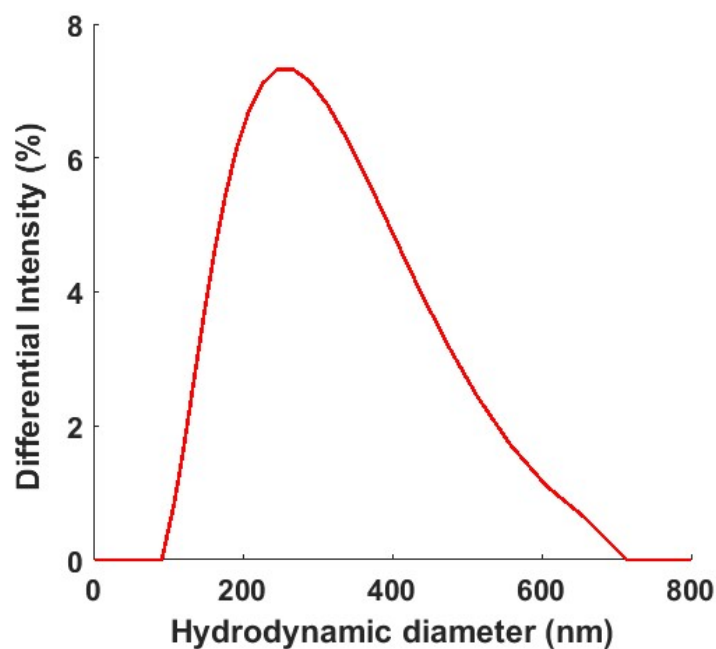

**Figure S4.** DLS result of the HEMA-modified pNIPAAm-AAc-Ruthenium nanogels.

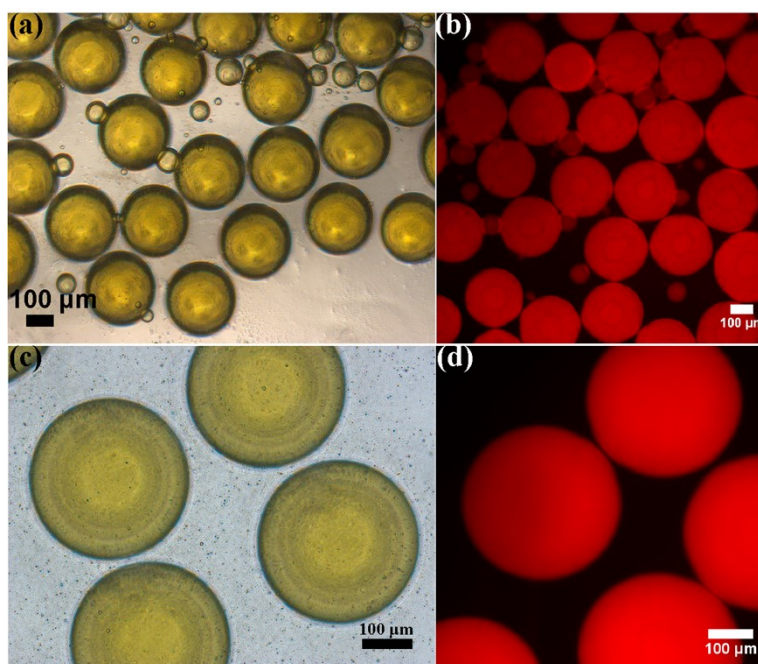

**Figure S5.** Optical microscopy images of two separate batches (a and c) of droplet samples just produced from microfluidics and collected in two containers, respectively. (c) and (d) are the corresponding fluorescence microscopy images of the two samples. The fluorescence microscopy images indicate that there were no obvious gel particle aggregates at very beginning. At least, there

22 was no detectable nanogel aggregates caused by electrostatic screening effect when the  
 23 concentrations of salt molecules were below a certain value, for example, the salt concentrations at  
 24 this moment was  $\sim 0.15$  M. This phenomenon is consistent with our previous study that there were  
 25 no microscopic scale gel particle aggregations when the concentration of  $\text{NaBrO}_3$  was below 0.2  
 26 M.<sup>1</sup>

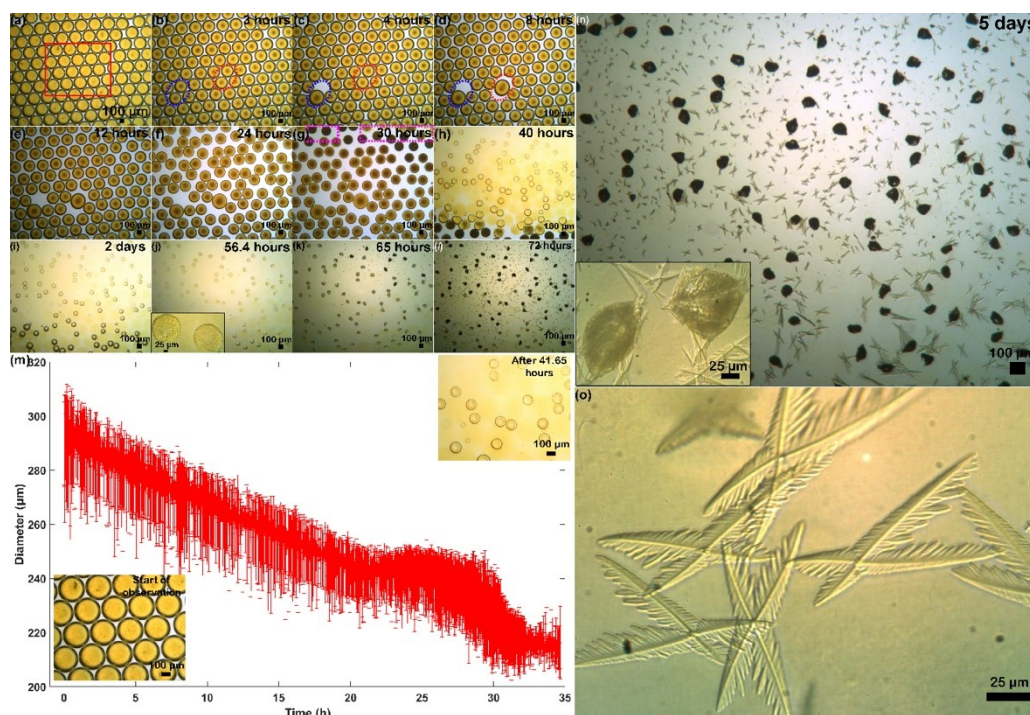

28 **Figure S6.** (a)-(f). Optical microscopy images of the evolution of another batch of droplets simply  
 29 under solvent evaporation. The square in (a) indicates the population of droplets that were  
 30 statistically measured their sizes and their sizes evolution was plotted in (m). (n). Optical  
 31 microscopy image of the droplets after 5 days of evolution. The photo indicates droplets were  
 32 transformed into gel particle-based aggregates and crystal-like structures. (o). Optical microscopy  
 33 image of the enlarged branched crystal-like structures.

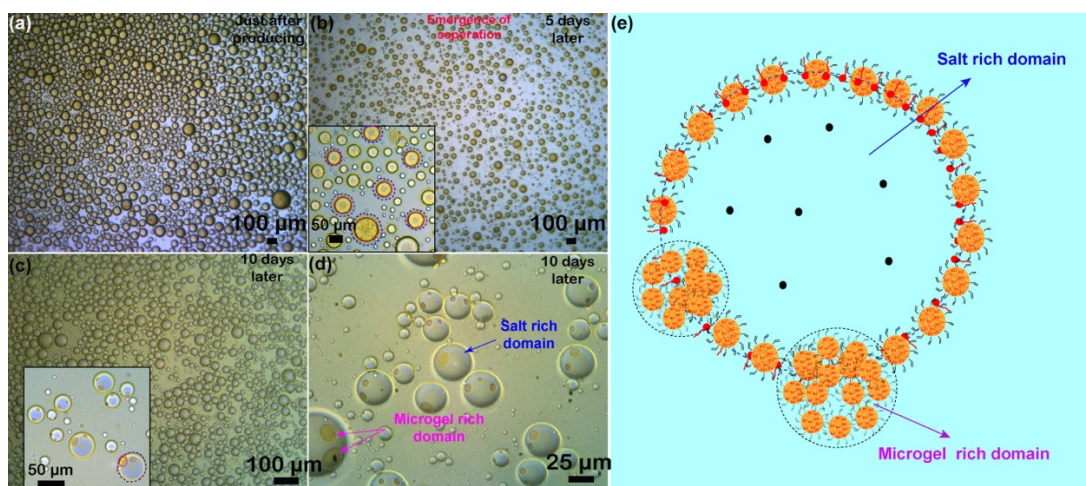

34

35 **Figure S7.** (a) Optical microscopy images of nanogel-containing droplets prepared by hand shaking  
 36 and with smaller sizes than that of from microfluidics. (b) - (c) The evolution of the droplets at  
 37 different stages revealed that there was a phase separation process, which induced the initially  
 38 homogeneous droplets gradually evolved into droplets with buddings. (d) Enlarged microscopy  
 39 figure of image (c). These budded droplets are composed of two parts: gel particle-rich part and  
 40 salt-rich part. (e) Illustration figure of the complex droplets in (d).

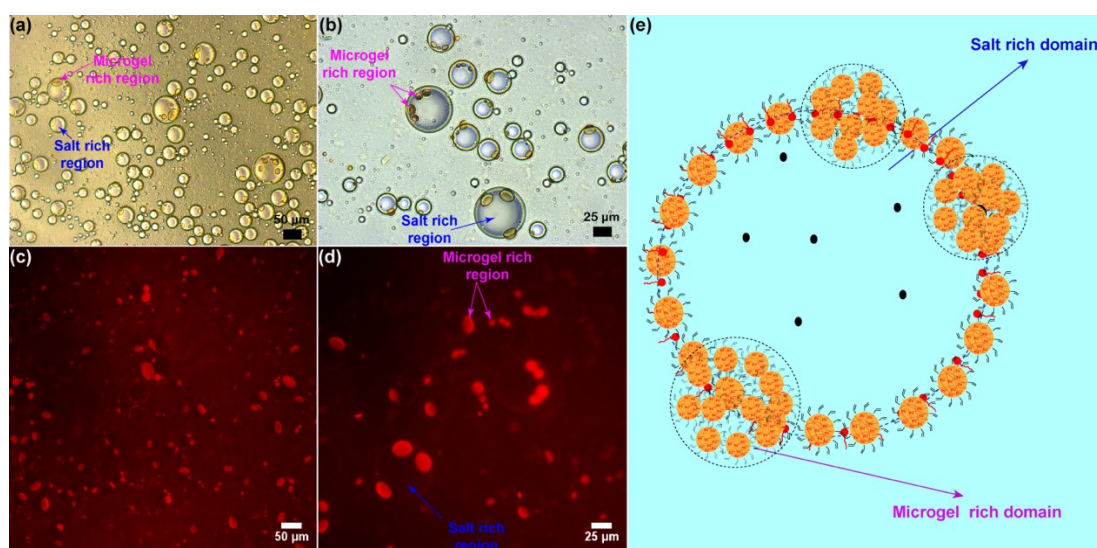

41

42 **Figure S8.** Optical microscopy images of gel particle-containing droplets after 10 days of  
 43 evolution: (a) - (b) Bright field; (c) - (d) Fluorescent mode. The evolved droplets displayed different  
 44 fluorescence features, further confirming that the initial homogeneous droplets gradually evolved  
 45 into droplets composed of gel particle-rich part and salt rich part. (e) Illustration figure of the  
 46 complex droplets in the left microscopy images (a - d).

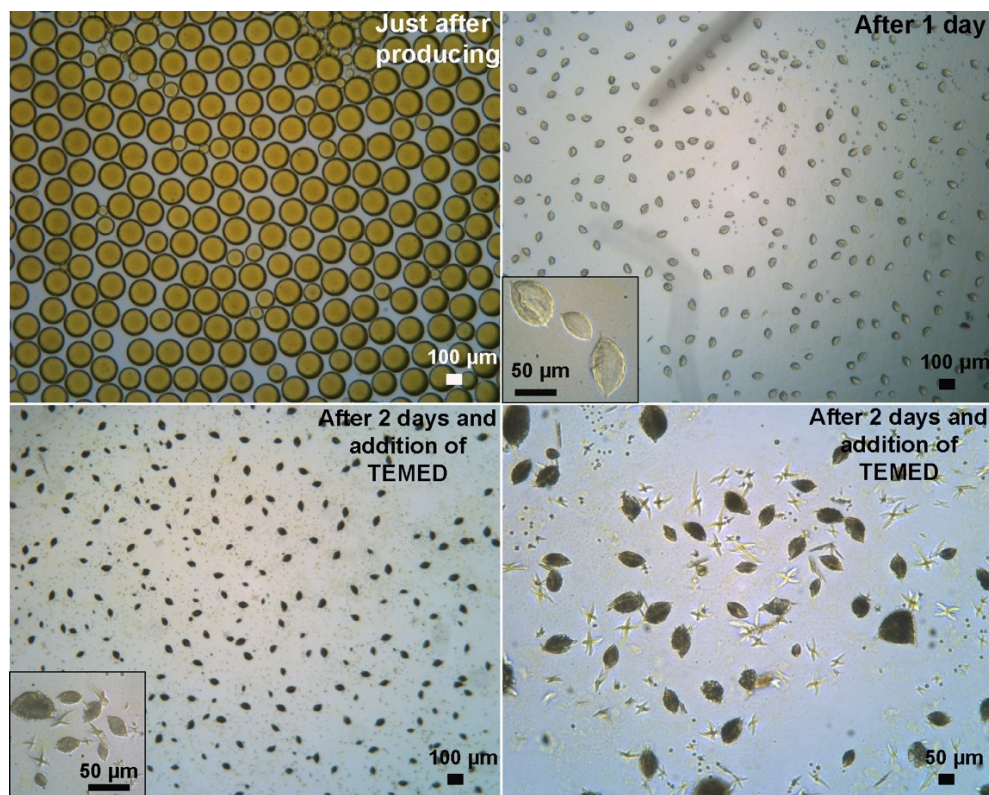

47

48 **Figure S9.** Optical microscopy images show the evolution of nanogel-containing droplets with an  
 49 average smaller diameter of  $\sim 150 \mu\text{m}$ . The droplets eventually evolve into two separate parts:  
 50 Chinese dumpling-like gel particle-rich aggregates and butterfly-like salt-rich crystal-like  
 51 structures.

52

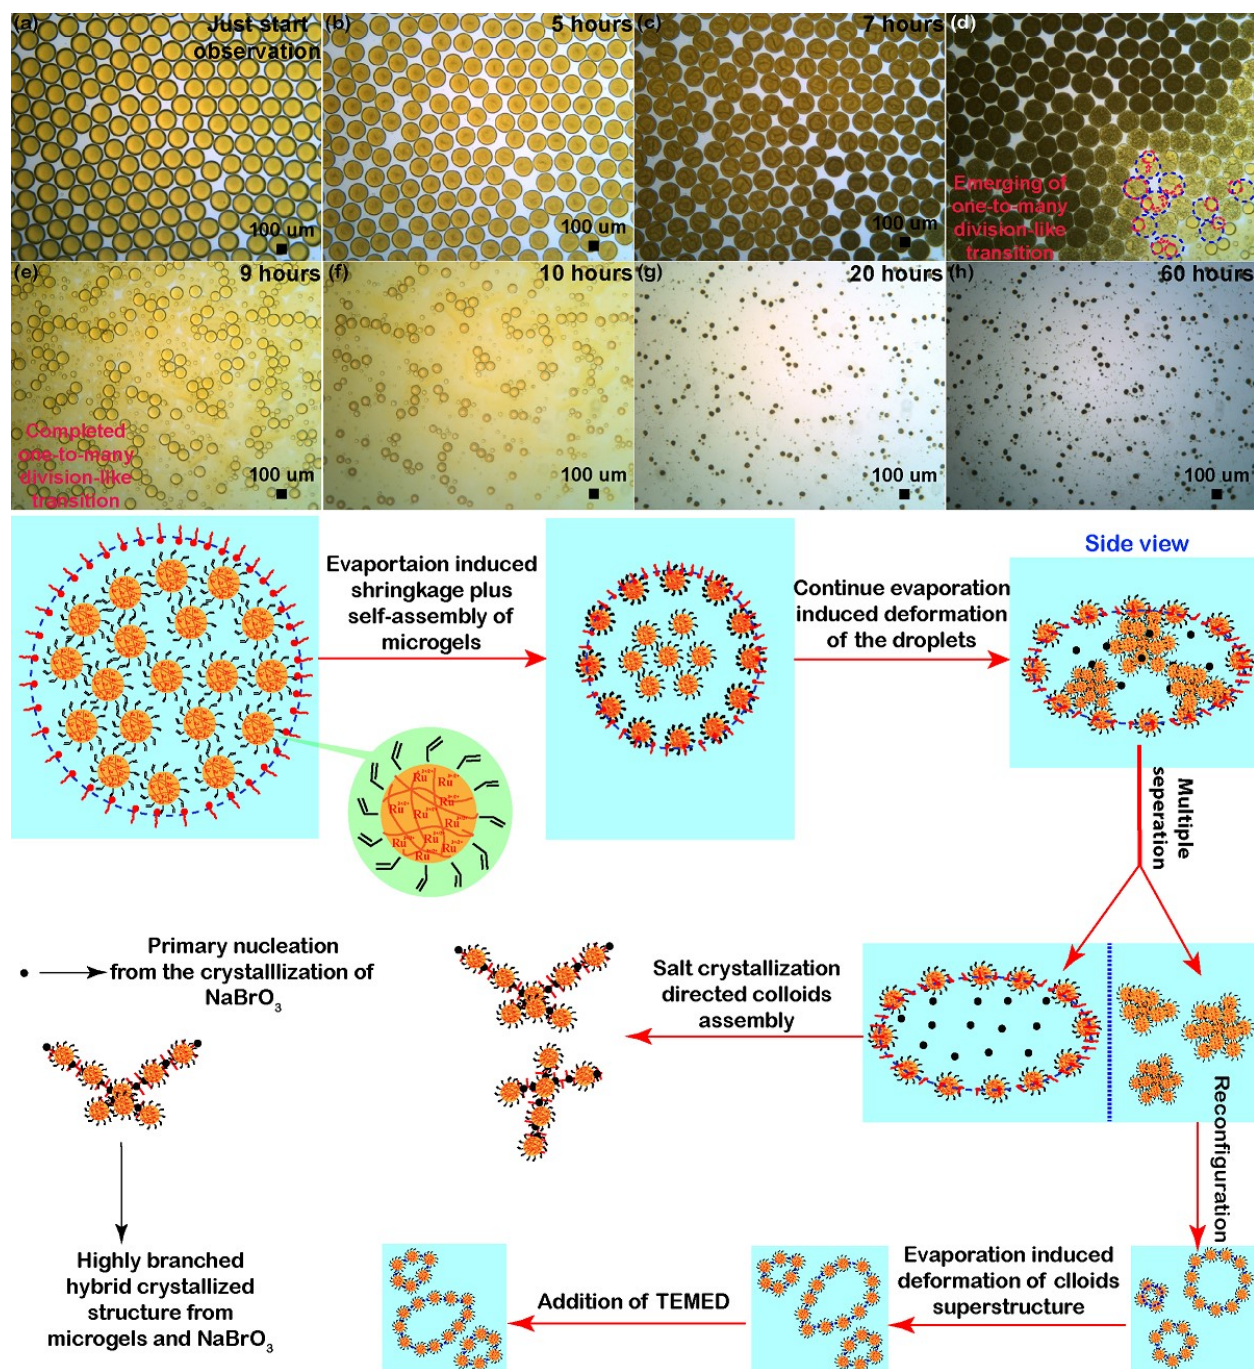

53

54 **Figure S10.** Top: Optical microscopy images of nanogel-containing droplets displaying one-to-  
 55 many division-like evolution behavior. (a) - (b) Droplet's size decrease process; (b) - (c) Shape  
 56 change process of the droplets. (d) - (e) Droplets undergo one-to-many division-like transition. (f)  
 57 Completion of the transition of droplets. (g) - (h) Continued evaporation of solvent in gel particle-  
 58 containing droplets. Bottom: Carton figure illustrates one-to-many evolution of the gel particle-  
 59 containing droplet.

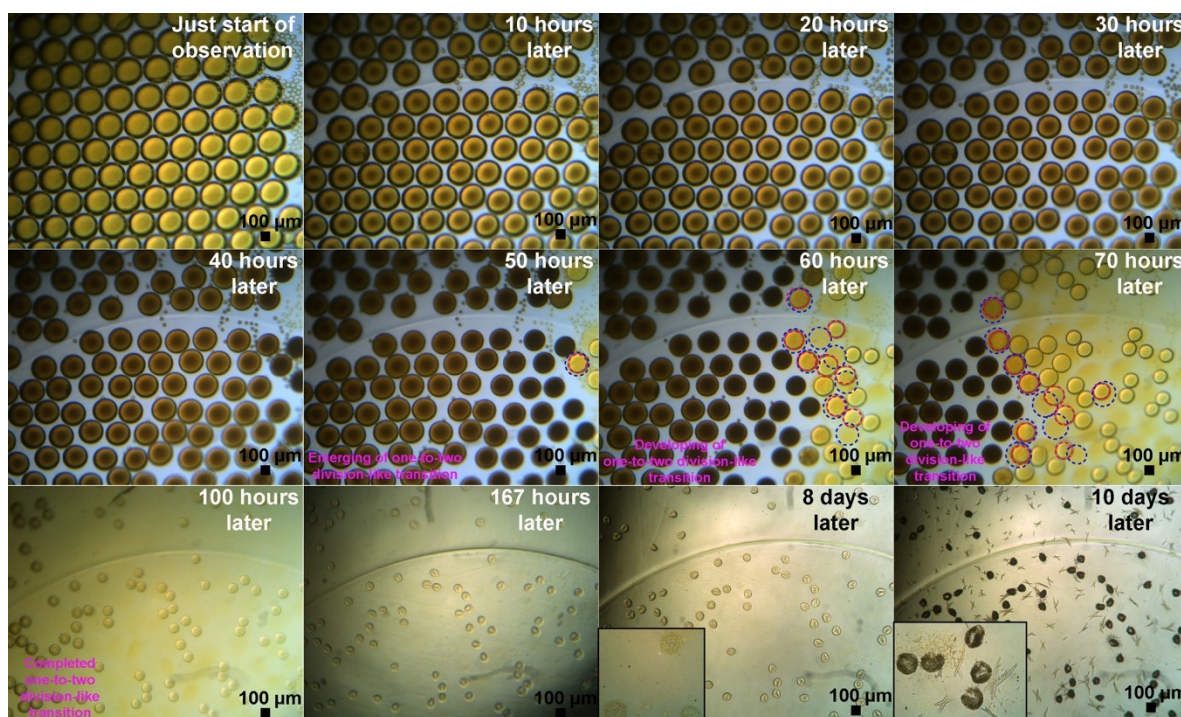

60

61 **Figure S11.** Optical microscopy images show that a population of droplets containing nanogels  
 62 evolved under a relatively slow solvent evaporation condition. The droplets displayed a one-to-two  
 63 replication-like feature. Despite the solvent evaporation rate is slower than that of other sets of  
 64 experiments, the droplets show a similar trend as that of the droplets under higher solvent  
 65 evaporation rate conditions.

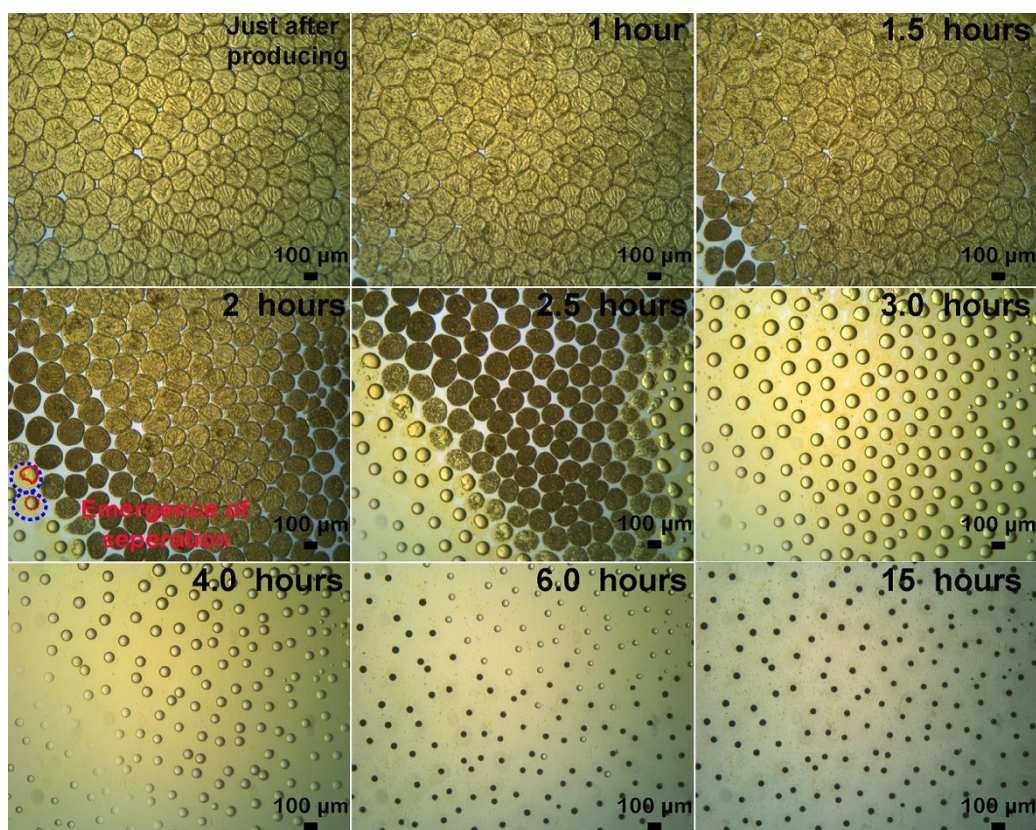

66

67 **Figure S12.** Optical microscopy images show that the evolution of a population of droplets  
 68 containing nanogels but with deformed shape. Despite the shape of the initial droplets is not  
 69 spherical and the  $\text{NaBrO}_3$  concentration is relatively higher, the gel particle-containing droplets still  
 70 underwent a phase separation in the sample evolution process. Higher concentration of  $\text{NaBrO}_3$   
 71 also advanced the separation process, which took place in a very short period after the droplets were  
 72 produced. For example, it only takes about 1.5 hours for the droplets to start to undergo the phase  
 73 separation process under the same evaporation condition.

74

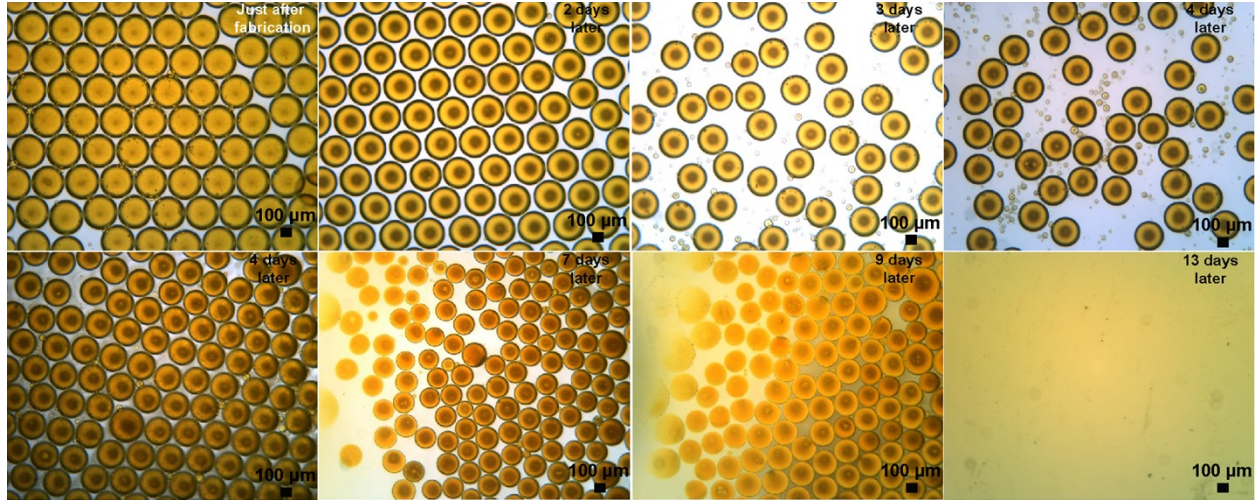

**Figure S13.** Microscopy images of the evolution of gel particle-containing droplets without addition of  $\text{NaBrO}_3$  and in a slow evaporation fashion (The droplets transformation process takes places within  $\sim 10$  days). The evaporation was monitored over a period of 13 days. Unlike the evolution of droplets with nanogels, the evolution of the nanogel-free droplets ends up with almost a blank background (with very small amount of gel particle residues). which is very similar to that of the droplets evolve in a fast evaporation mode. This experiment indicates that it is indispensable for droplets to contain  $\text{NaBrO}_3$  composition to ensure the occurrence of phase separation process. And the occurrence of phase separation process is independent of the solvent evaporation rate in our observation range.

Supposing the concentrations of  $\text{NaBrO}_3$  of the droplet's solution at the initial state and at any given point  $t$  are  $C_i$  and  $C_t$ , respectively, while the corresponding diameters of the droplet are  $d_i$  and  $d_t$ , given the fact of that the total amount of  $\text{NaBrO}_3$  in each droplet is constant at  $m$  before undergoing crystallization, where

$$m = C_i \cdot \pi \cdot 4(d_i/2)^3 = C_t \cdot \pi \cdot 4(d_t/2)^3$$

Therefore, the relationship between these two parameters is:

$$C_t = C_i \cdot (d_i/d_t)^3$$

Similarly, the time-dependent concentration  $c_t$  of gel particles in the droplet is as follows:

$$c_t = c_i \cdot (d_i/d_t)^3$$

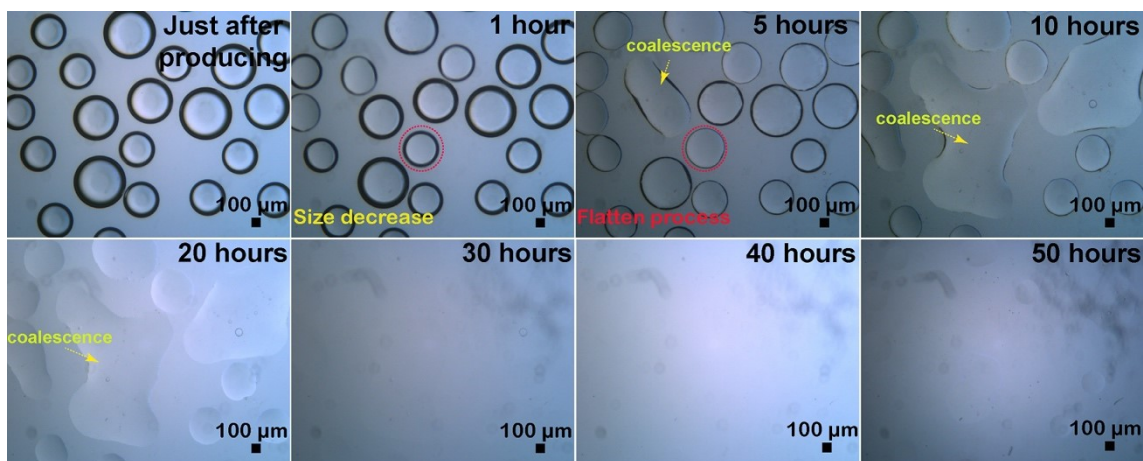

95

96 **Figure S14.** Evolution process of nanogel-free droplets under optical microscopy. The droplets  
 97 underwent size decrease process and followed with a flatten process but without showing any  
 98 separation phenomenon as that of the droplets containing nanogels. In addition, the large interfacial  
 99 tension between the droplets and external Span 80/1-Decanol solution prevents the droplets from  
 100 keeping stable, which gradually leads to the coalescence of droplets. The absence of showing the  
 101 phase separation process in this set of experiment indicates that nanogels are critical for the  
 102 droplets' separation process.

103

#### 104 Appendix

| Experiment Number | 3 wt% gel particle solution | 2 M NaBrO <sub>3</sub> Solution | 1 wt% KPS solution | H <sub>2</sub> O | Corresponding to Figures |
|-------------------|-----------------------------|---------------------------------|--------------------|------------------|--------------------------|
| 1                 | 500                         | 50                              | 83                 | 175              | Figure 2, S5-S9, S11-S12 |
| 2                 | 500                         | 50                              | 83                 | 0                | Figure S10               |
| 3                 | 500                         | 0                               | 0                  | 0                | Figure S3 and Figure S13 |
| 4                 | 0                           | 50                              | 83                 | 500              | Figure S14               |

105

#### Droplets' compositions in different Figures

| Droplets Preparation Method | Microfluidics                         | Handshaking |
|-----------------------------|---------------------------------------|-------------|
| Corresponding to Figures    | Figure 2-3, Figure S5-6, Figure S9-14 | Figure S7-8 |

106 Droplets composition in different Figures

107 The above-mentioned table refers to the droplet composition in the study of the manuscript. The  
108 external oil phase in all the experiments was decanol solution of span 80(5 wt%).

| Droplets Evaporation Rate | Slow                                               | Slower                                 |
|---------------------------|----------------------------------------------------|----------------------------------------|
| Corresponding Figures     | Figure 2-3, Figure S6,<br>Figure S9-10, Figure S14 | Figure S7-8, Figure S11,<br>Figure S13 |

109 Droplet evaporation rates in different Figures

110 (Note: All the experiments were conducted at slow (sample was loosely covered with a petri dish  
111 cover or tightly covered with a petri dish cover.)

112

113 **References:**

114 [1] Y. Hu, J. Perez-Mercader *Macromol Rapid Commun.* **2017**, 38, DOI:  
115 10.1002/marc.201600577.

116
